# Supplementary material for: Correlation of age-of-onset of Atopic Dermatitis with Filaggrin loss-of-function variant status
Source: PubMed Central journal article supplement (PMC7026049; doi:10.1038/s41598-020-59627-7), 2020-02-17

# Correlation of age-of-onset of Atopic Dermatitis with *Filaggrin* loss-of-function variant status

Smieszek SP<sup>1</sup>, Welsh S<sup>1</sup>, Xiao C<sup>1</sup>, Wang J<sup>1</sup>, Polymeropoulos C<sup>1</sup>, Birznieks G<sup>1</sup>, Polymeropoulos MH<sup>1</sup>

<sup>1</sup> Vanda Pharmaceuticals Inc., Washington, DC

Corresponding Author: [Sandra.Smieszek@vandapharma.com](mailto:Sandra.Smieszek@vandapharma.com)

# S. Table 1

**Table 1. Study Demographics**

| <b>All Randomized Subjects</b>                   | <b>Tradipitant (N=84)</b> | <b>Placebo (N=84)</b> | <b>Total (N=168)</b> |
|--------------------------------------------------|---------------------------|-----------------------|----------------------|
| <b>Gender - n (%)</b>                            |                           |                       |                      |
| <i>Male</i>                                      | 32 (38.1)                 | 31 (36.9)             | 63 (37.5)            |
| <i>Female</i>                                    | 52 (61.9)                 | 53 (63.1)             | 105 (62.5)           |
| <b>Age (years)</b>                               |                           |                       |                      |
| <i>Mean (min,max)</i>                            | 41 (18,66)                | 39 (18,64)            | 40 (18,66)           |
| <b>Race - n (%)</b>                              |                           |                       |                      |
| <i>White</i>                                     | 49 (58.3)                 | 57 (67.9)             | 106 (63.1)           |
| <i>Black or African American</i>                 | 24 (28.6)                 | 18 (21.4)             | 42 (25.0)            |
| <i>Asian</i>                                     | 6 (7.1)                   | 5 (6.0)               | 11 (6.5)             |
| <i>American Indian or Alaska Native</i>          | 0                         | 1 (1.2)               | 1 (0.6)              |
| <i>Native Hawaiian or Other Pacific Islander</i> | 2 (2.4)                   | 0                     | 2 (1.2)              |
| <i>Other</i>                                     | 3 (3.6)                   | 3 (3.6)               | 6 (3.6)              |
| <b>Itch VAS</b>                                  |                           |                       |                      |
| <i>Average Mean (SD)</i>                         | 81.3 (10.8)               | 80.3 (8.7)            | 80.8 (9.8)           |
| <i>Worst Mean (SD)</i>                           | 85.1 (10.0)               | 82.7 (10.0)           | 83.9 (10.0)          |
| <b>SCORAD</b>                                    |                           |                       |                      |
| <i>Mean (SD)</i>                                 | 47.4 (13.0)               | 45.7 (13.7)           | 46.5 (13.3)          |

# S. Figure 1

Figure 1. Study Design

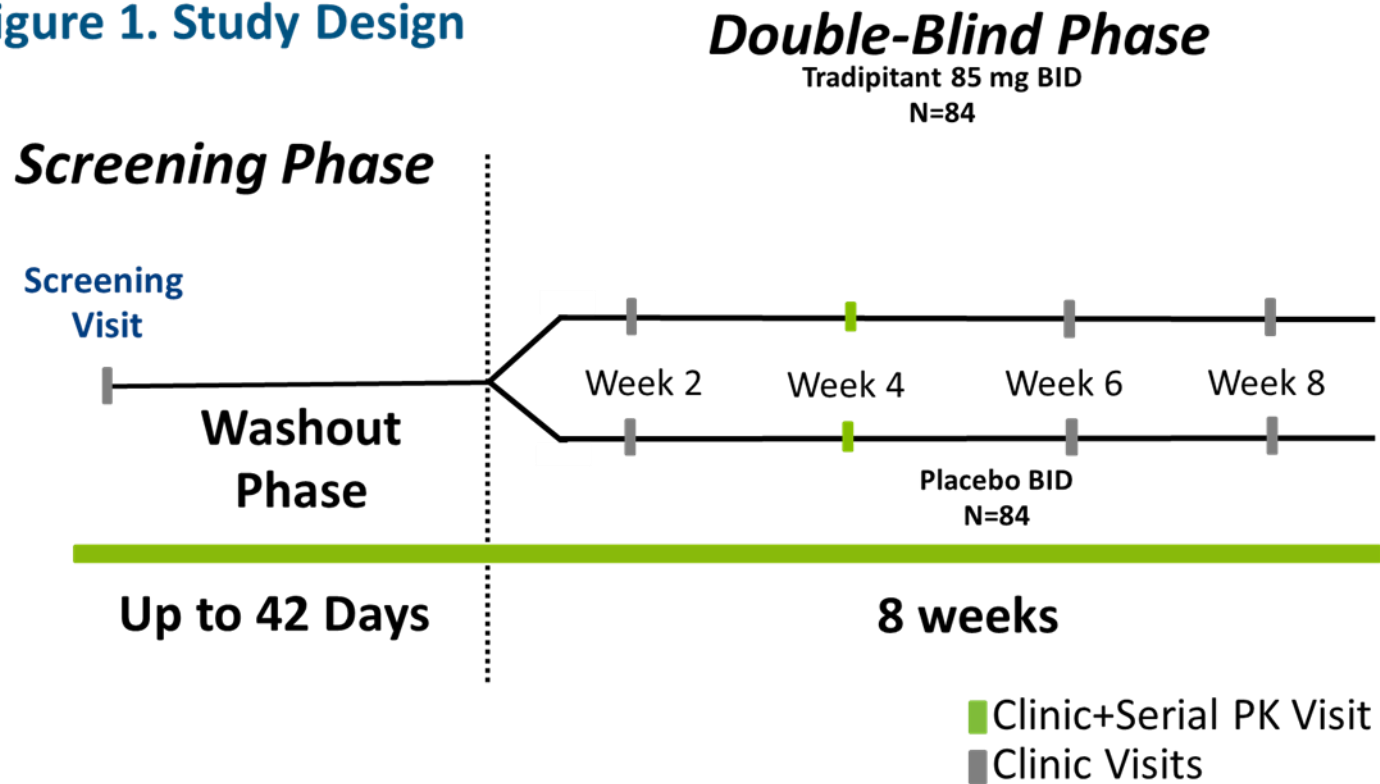

# S. Figure 2

| CHR | BP        | VARID                   | GENE   | VARTYPE             | AA CHANGE                               |
|-----|-----------|-------------------------|--------|---------------------|-----------------------------------------|
| 1   | 152059278 | 1:152059278[b37]A,G     | TCHHL1 | stopgain            | NM_001008536:c.C880T:p.Q294X            |
| 1   | 152086555 | 1:152086555[b37]A,AT    | TCHH   | frameshift          | NM_007113:c.1delA:p.M1fs                |
| 1   | 152191806 | 1:152191806[b37]A,G     | HRNR   | stopgain            | NM_001009931:c.C2299T:p.R767X           |
| 1   | 152279874 | 1:152279874[b37]T,TG    | FLG    | frameshift          | NM_002016:c.7487delC:p.T2496fs          |
| 1   | 152280023 | 1:152280023[b37]A,G     | FLG    | stopgain            | NM_002016:c.C7339T:p.R2447X             |
| 1   | 152280670 | 1:152280670[b37]G,T     | FLG    | stopgain            | NM_002016:c.C6692A:p.S2231X             |
| 1   | 152281645 | 1:152281645[b37]G,T     | FLG    | stopgain            | NM_002016:c.C5717A:p.S1906X             |
| 1   | 152283341 | 1:152283341[b37]G,GT    | FLG    | frameshift          | NM_002016:c.4020delA:p.G1340fs          |
| 1   | 152284886 | 1:152284886[b37]A,G     | FLG    | stopgain            | NM_002016:c.C2476T:p.R826X              |
| 1   | 152285076 | 1:152285076[b37]C,CACTG | FLG    | frameshift deletion | NM_002016:c.2282_2285del:p.S761fs       |
| 1   | 152285861 | 1:152285861[b37]A,G     | FLG    | stopgain            | NM_002016:c.C1501T:p.R501X              |
| 1   | 152323658 | 1:152323658[b37]T,TGTGA | FLG2   | frameshift          | NM_001014342:c.6600_6603del:p.T2200fs   |
| 1   | 152326321 | 1:152326321[b37]G,GTA   | FLG2   | frameshift          | NM_001014342:c.3940_3941insTA:p.T1314fs |

SFTP coding variants, n=13  
(t-val=6.54, p<0.00001)

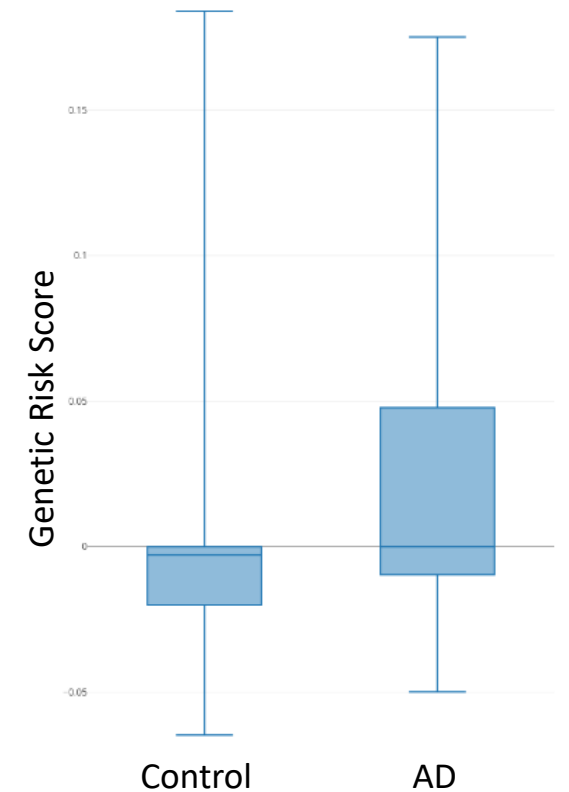

S.Figure 3

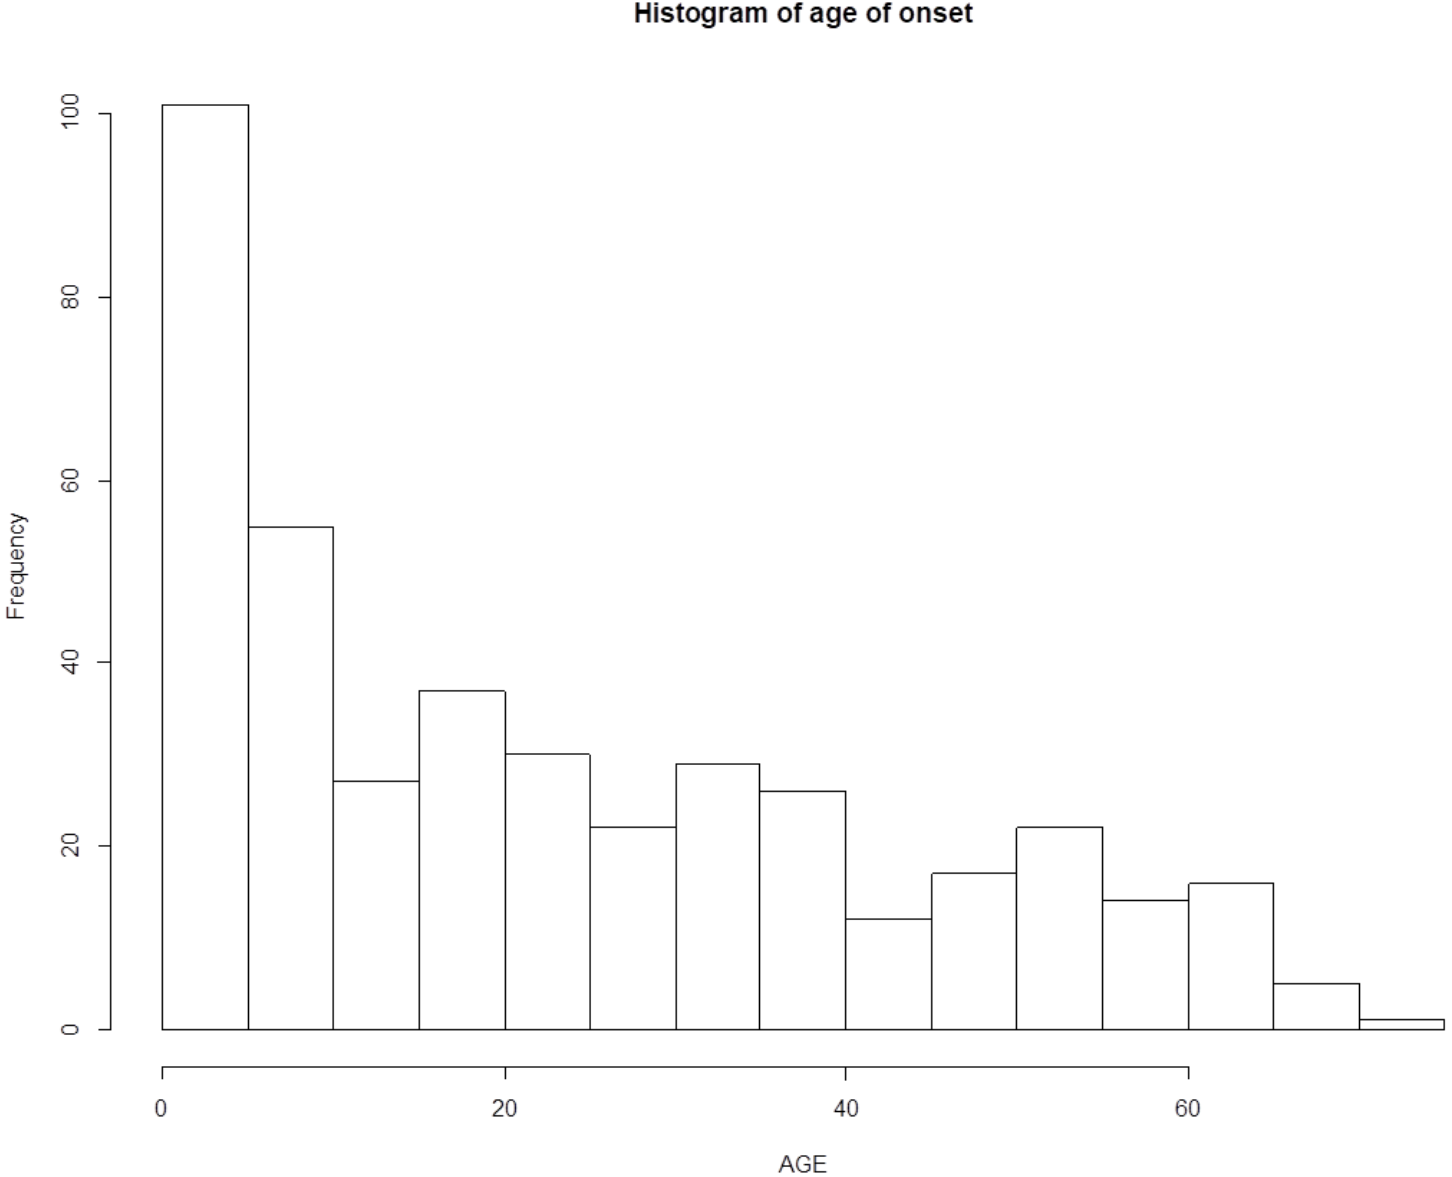

S.Figure 4

For 501X R and F respectively x 2

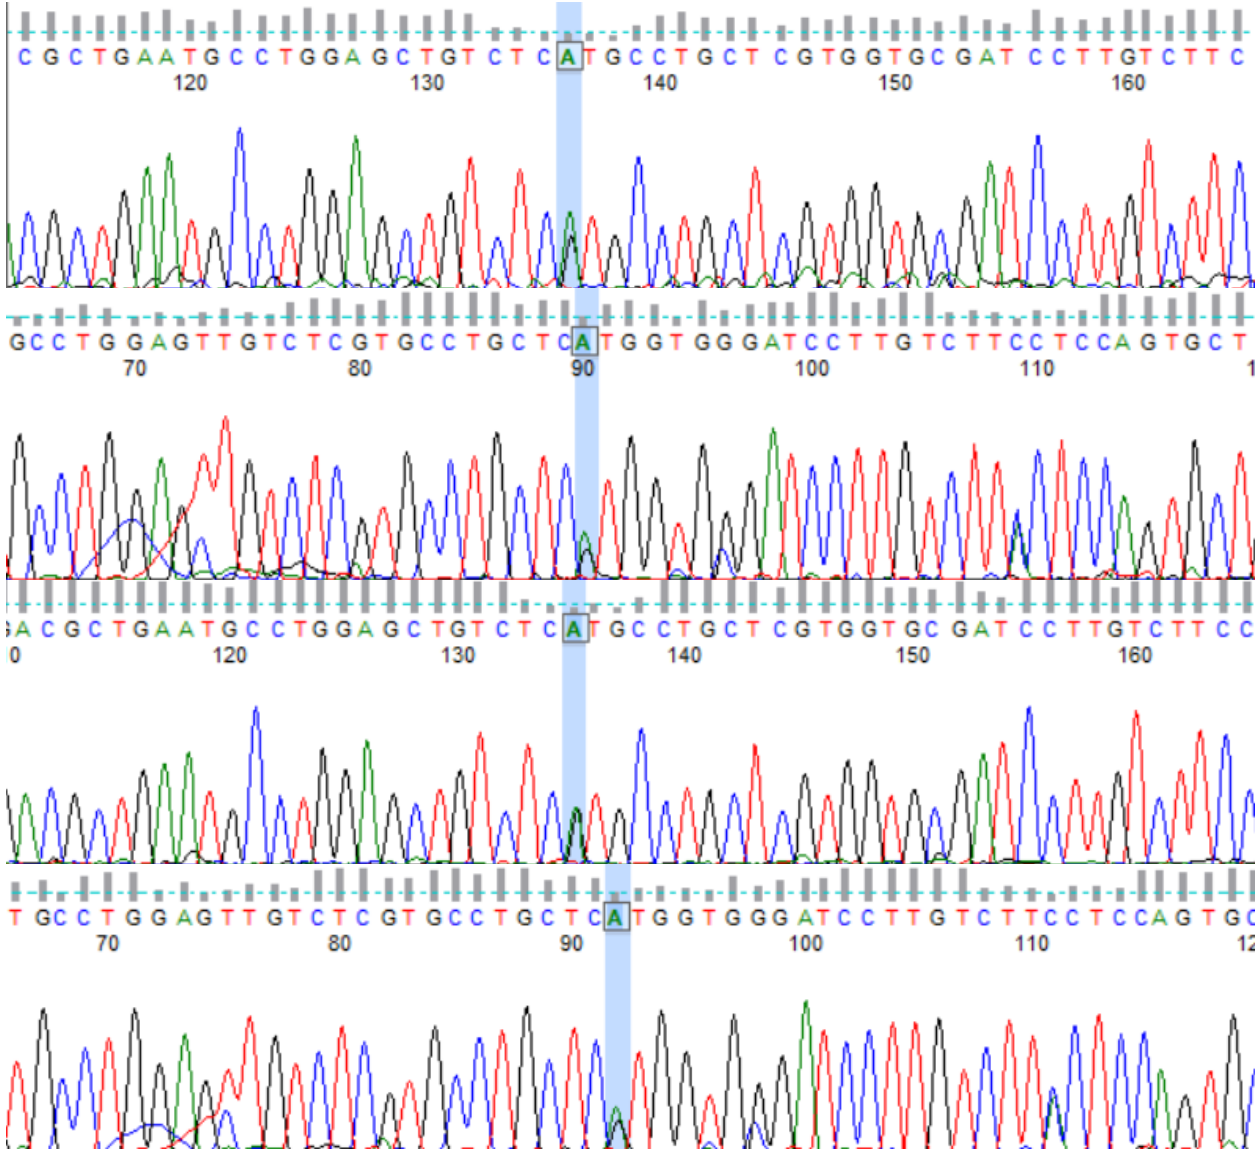

Former figure 2, now replaced with lollipop plot

Enrichment of rare FLG LOF variants in FLG in AD patients (2 studies) and control population

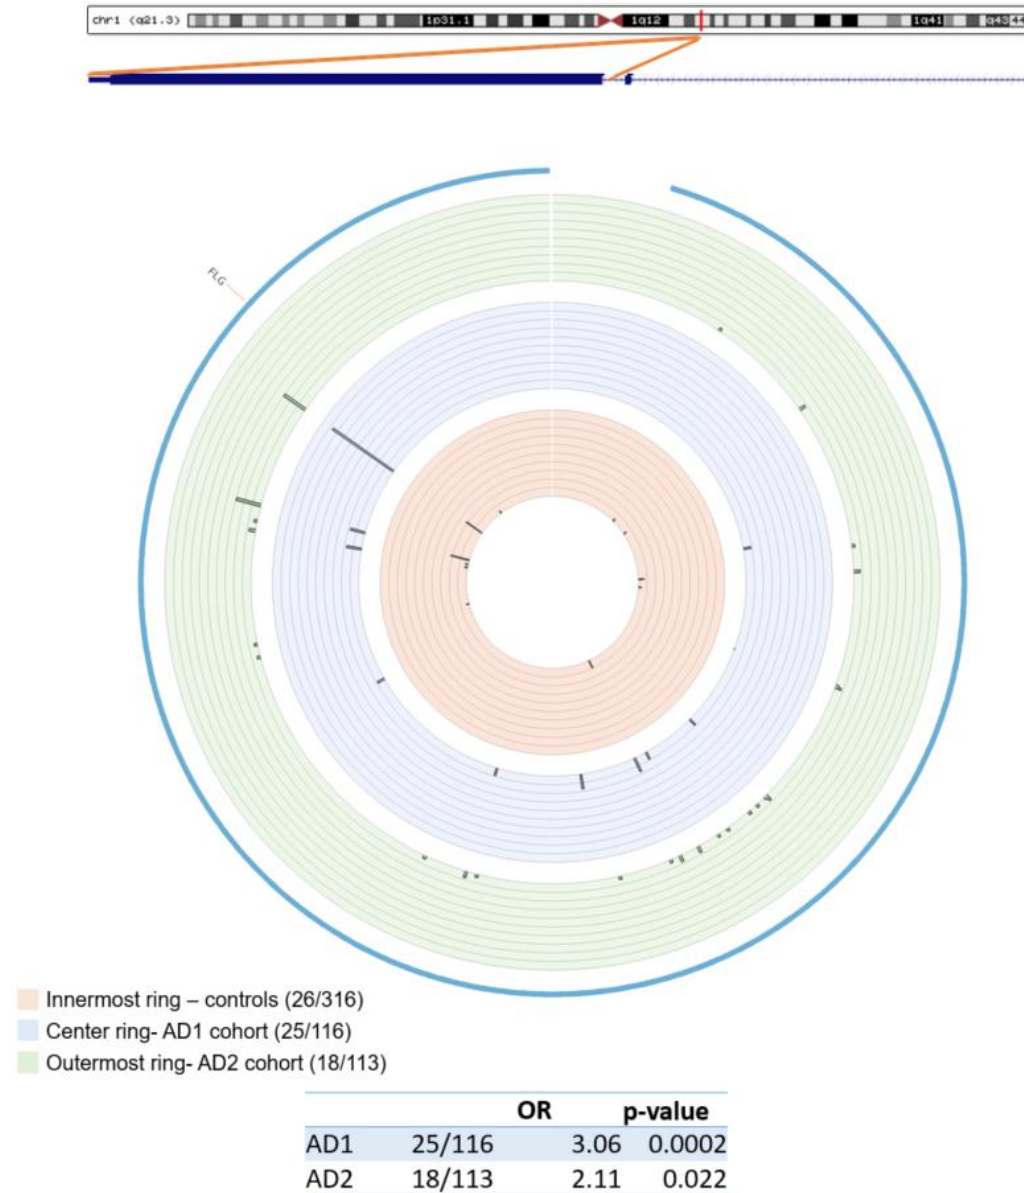

Supplement: 41598_2020_59627_MOESM1_ESM.pdf [file 41598_2020_59627_MOESM1_ESM.pdf]
